# Supplementary material for: Efficacy, Safety and Feasibility of Superior Vena Cava Isolation in Patients Undergoing Atrial Fibrillation Catheter Ablation: An Up-to-Date Review
Source: MDPI journal article supplement (doi:10.3390/biomedicines11041022), 2023-03-27
Supplement: s1 [file s1]

**Supplementary Table S1:** Cohorts reporting on superior vena cava isolation in patients with atrial fibrillation

| Author                      | Energy source                                                           | N             | Index | Previous Source | AF type                | SVC-trigger     | Female (%) | Age                   | HF (%)   | FU           | Recurrence (%)               | Safety                        | Feasibility                      | SVCI Procedural data                                                                                                                                                                           |
|-----------------------------|-------------------------------------------------------------------------|---------------|-------|-----------------|------------------------|-----------------|------------|-----------------------|----------|--------------|------------------------------|-------------------------------|----------------------------------|------------------------------------------------------------------------------------------------------------------------------------------------------------------------------------------------|
| <b>CPVI+ as needed SVCI</b> |                                                                         |               |       |                 |                        |                 |            |                       |          |              |                              |                               |                                  |                                                                                                                                                                                                |
| Tsai et al 2000 Taiwan      | RF (CPVI +SVCI)                                                         | 8             | Yes   | N/A             | PAF                    | yes (8)         | 50         | 55 ± 12               | N/R      | 9±3 mo       | (0/8)                        | 0 SVCS                        | 75% (6/8)<br>2 partly eliminated | mean RF apps: 5±3                                                                                                                                                                              |
| Arruda et al 2008 USA       | RF                                                                      | 24            | Yes   | N/A             | PAF, PeAF              | yes             | N/R        | N/R                   | N/R      | 450 ± 180 d  | 0                            | 0 SVCS<br>0 SNI               | N/R                              | N/R                                                                                                                                                                                            |
| Chen et al 2011 China       | RF, CPVI + additional linear ablation (MAI, CTI, roof line & CS) ± SVCI | 132           | Yes   | N/A             | AF or atypical Flutter | 35/132          | 50 (3/6)   | N/R                   | excluded | N/R          | N/R                          | 6/132 SNI                     | N/R                              | N/R                                                                                                                                                                                            |
| Miyazaki et al 2014 Japan   | RF (CPVI ± SVCI)± CFAEs/CTI                                             | 836<br>44/792 | Yes   | N/A             | PAF, PeAF              | yes             | 30 vs. 24  | 59 ± 11<br>vs.63 ± 10 | N/R      | 17 mo (9-27) | 11.4<br>1.5 ± 0.7 procedures | 2 PNI (t)                     | 100                              | N/R                                                                                                                                                                                            |
| Shi et al 2015 China        | RF (CPVI+SVCI)± LA bottom line, MAI, CTI                                | 30            | Yes   | N/A             | PAF                    | yes             | 40         | 59 ± 16               | N/R      | 18 ± 6 mo    | 6.6 (2) ER<br>3.3(1) LR      | 0 PNI<br>0 SNI<br>0 tamponade | 70%                              | mean SVCIT (min): 14.3 ± 11.5<br>mean SVCI FT (min): 9.6 ± 3.8<br>mean RF apps: 11.2 ± 3.1                                                                                                     |
| Xu et al 2017 China         | RF (CPVI± CFAE,LA roof, AT ablation)±SVCI                               | 102           | Yes   | N/A             | PeAF                   | 1/102           | 37         | 63 ± 9                | 8        | 12 mo        | 56.9                         | Zero                          | N/R                              | mean PT (min): 166±22<br>mean FT (min): 17±3                                                                                                                                                   |
| Tanaka et al 2018 Japan     | RF [CPVI±Linear ablations (LA roof± bottom ± MAI)]±CTI                  | 113           | Yes   | N/A             | PAF, PeAF              | 38.1 % (43/113) | 28         | 63 ±12                | 7        | N/R          | N/R                          | 2 PNI<br>0SNI                 | N/R                              | mean SVC mapping: 10.8±5.5 min<br>mean RF app: 4.2±0.9 vs.. 10.2±2.8; p<0.0001<br>mean RF energy (J) 5,042±1,581 vs.. 10,582±2,335, p<0.000<br>mean SVCIT (min) 3.3±1.2 vs.. 10.2±2.8 p<0.0001 |

[illegible]

|                                              |                                                  |               |                |        |              |                                     |     |         |      |                |                                                                                               |                                  |                                                                      |                                                                                                                                                            |
|----------------------------------------------|--------------------------------------------------|---------------|----------------|--------|--------------|-------------------------------------|-----|---------|------|----------------|-----------------------------------------------------------------------------------------------|----------------------------------|----------------------------------------------------------------------|------------------------------------------------------------------------------------------------------------------------------------------------------------|
| Arruda et al<br>2008<br>USA                  | RF                                               | 217           | Yes            | N/A    | PAF,<br>PeAF | No                                  | N/R | N/R     | N/R  | 450 ±<br>180 d | N/R                                                                                           | 0 SVCS<br>0 SNI<br>2 PNI (t)     | 82%<br>40 patients<br>(18%) PNI<br>at risk                           | N/R                                                                                                                                                        |
| Gianni et al<br>2017<br>Italy                | RF CPVI+ SVCI                                    | 105           | Yes or<br>redo | N/A    | PAF,<br>PeAF | No                                  | 18  | 67 ± 9  | N/R  | 9 ± 6mo        | N/R                                                                                           | 2 PNI<br>0 SNI                   | 98%<br>(2<br>obviating<br>PNI)                                       | Mean PT (min): 125± 37<br>Median SVCI RF time (sec) :<br>134 (89–203)                                                                                      |
| Arceluz et al<br>2018<br>Spain               | LB (CPVI±SVCI)                                   | 13            | Yes            | N/A    | PAF,<br>PeAF | No                                  | 15  | 59 ± 11 | 30.7 | 19 ± 3<br>mo   | 15                                                                                            | 3 PNI (p)<br>(23%)               | 61% (8/13)<br>(3 PNI<br>1 laser<br>malfunction<br>1 lead<br>failure) | mean SVCI power (W) : 6.3<br>± 2.3<br>mean SVCIT (min): 5.38 ±<br>2.4                                                                                      |
| Rubio<br>Campal et al<br>2020<br>Spain       | CB (PVI+SVCI)                                    | 30            | yes or<br>redo | N/A    | PAF,<br>PeAF | No                                  | 26  | 62 ± 9  | N/R  | 5 ± 2 mo       | 11                                                                                            | 1 PNI (t)<br>1 SNI (t)<br>0 SVCS | 89%<br>(2 no SVC<br>potential)                                       | mean cryo time (sec): 92 ±<br>15<br>Mean no of freeze: 2.3 ± 1<br>Mean SVCIT (sec): 37 ± 20<br>mean FT (min); PV 17 ± 2<br>mean FT (min); SVC 1.5 ±<br>0.9 |
| Omuro et al<br>2021<br>Japan                 | RF (CPVI+ SVCI vs.<br>CPVI)                      | 153<br>102/51 | Yes            | N/A    | NPAF         | No                                  | 22  | 65 ± 10 | 26.1 | 18 mo          | N/R                                                                                           | 0 vs. 1<br>vascular<br>0 PNI     | 100%                                                                 | N/R                                                                                                                                                        |
| Gu et al<br>2021<br>China                    | RF( non-PV foci, SVCI,<br>CFAE, linear ablation) | 64            | redo           | RF PVI | PAF,<br>PeAF | no                                  | 45  | 61 ± 11 | N/R  | 20 ± 10<br>mo  | 21 vs. 50<br>independent<br>protector<br>(HR: 0.338;<br>95% CI:<br>0.131–0.873;<br>p = 0.025) | N/R                              | N/R                                                                  | N/R                                                                                                                                                        |
| <b>Mixed modalities and index procedures</b> |                                                  |               |                |        |              |                                     |     |         |      |                |                                                                                               |                                  |                                                                      |                                                                                                                                                            |
| Kimura et al<br>2012<br>Japan                | RF (CPVI± linear,<br>CFAE)                       | 41            | Yes or<br>redo | N/R    | PAF,<br>PeAF | (yes if<br>index,<br>no in<br>redo) | 19  | 59 ± 9  | N/R  | 12 ± 7<br>mo   | 12.2                                                                                          | 1 PNI (t)                        | 100%                                                                 | mean RF (sec): 365 ± 204<br>No of SVCI app times: 12 ±<br>6<br>mean RF power 20± 5 W                                                                       |
| Fukumoto et<br>al 2014<br>Japan              | RF (CPVI + SVCI)                                 | 25            | yes or<br>redo | N/R    | PAF,<br>PeAF | yes<br>(13)<br>empiric<br>(12)      | 24  | 57 ± 9  | N/R  | 619 ± 5d       | 4 (1/25)                                                                                      | 1 PNI (t)                        | 100%                                                                 | Mean RF apps: 10 ± 6.5                                                                                                                                     |

N=study population, Index= first ablation procedure, redo= repeat ablation procedure due to arrhythmia recurrence, AF=atrial fibrillation, SVC=superior vena cava, HF=heart failure, FU= follow up period, SCVI= SVC isolation, RF= radiofrequency, CB= cryoablation, LB= laser ablation, CPVI= circumferential pulmonary vein isolation, CTI= cavotricuspid isthmus, MAI= mitral annulus isthmus, CFAE=complex fractionated atrial electrograms, CMAPs= compound motor action potentials, PAF=paroxysmal AF, PeAF= persistent AF, L-PeAF= long standing PeAF, mo= months, h=hours, NS= non-significant, ER= early arrhythmia recurrence, LR= late arrhythmia recurrence, PNI=phrenic nerve injury, SNI= sinus node injury, PVS.= pulmonary vein stenosis, SCVS.= SVC stenosis, (p)=permanent, (t)= transient, SVCIT= SVC isolation time, app=application, FT= fluoroscopy time, PT= procedure time, AT=ablation time, min= minutes, N/A= not applicable, N/R= not reported.
